# Supplementary material for: Bassoon contributes to tau-seed propagation and neurotoxicity
Source: PubMed Central journal article supplement (PMC9708566; doi:10.1038/s41593-022-01191-6), 2022-11-07
Supplement: 41593_2022_1191_MOESM1_ESM.pdf [file 41593_2022_1191_MOESM1_ESM.pdf]

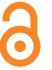

---

# Bassoon contributes to tau-seed propagation and neurotoxicity

---

In the format provided by the authors and unedited

## Supplementary Information

**Supplementary Table 1.** Human AD and PSP cases used in this study.

| Case | Disease | Cerad | Braak | Age | Sex | Race | PMD   | Brain region | Assay            |
|------|---------|-------|-------|-----|-----|------|-------|--------------|------------------|
| 4    | Control | -     | -     | 63  | F   | W    | 22    | MFG, PONS    | SEC, Seeding, IF |
| 39   | Control | -     | -     | 63  | M   | W    | 30-34 | MFG, PONS    | SEC, Seeding, IF |
| 123  | Control | -     | -     | 80  | F   | W    |       | MFG, PONS    | SEC, Seeding     |
| 155  | Control | -     | -     | 72  | M   | W    | 24    | MFG, PONS    | SEC, Seeding     |
| 189  | Control | -     | -     | 71  | F   | W    | 17    | MFG, PONS    | SEC, Seeding     |
| 2338 | AD      | C     | 6     | 87  | M   | W    | 7     | MFG          | IF, Seeding      |
| 2344 | AD      | C     | 5     | 86  | M   | W    | 5     | MFG          | SEC, Seeding     |
| 2423 | AD      | B     | 6     | 89  | F   | W    | 7     | MFG          | IF, Seeding      |
| 2447 | AD      | C     | 6     | 65  | M   | W    | 11    | MFG          | IF, Seeding      |
| 2494 | AD      | C     | 4     | 81  | F   | W    | 15    | MFG          | SEC, Seeding     |
| 2495 | AD      | C     | 5     | 67  | M   | W    | 6     | MFG          | SEC, Seeding     |
| 1715 | PSP     | 0     |       | 77  | F   | W    | 2     | PONS         | SEC, Seeding     |
| 1827 | PSP     | 0     |       | 72  | F   | W    | 15    | PONS         | SEC, Seeding     |
| 2121 | PSP     | 0     | 4     | 85  | M   | W    | 7     | PONS         | SEC, Seeding     |
| 2147 | PSP     | 0     | 4     | 87  | F   | W    | 17    | PONS         | IF, Seeding      |
| 2159 | PSP     | 0     | 0     | 74  | F   | W    | 20    | PONS         | IF, Seeding      |
| 2421 | PSP     | 0     | 4     | 66  | M   | W    | 9.5   | PONS         | IF, Seeding      |
