# Supplementary material for: Bassoon contributes to tau-seed propagation and neurotoxicity
Source: PubMed Central journal article supplement (PMC9708566; doi:10.1038/s41593-022-01191-6), 2022-11-07
Supplement: 41593_2022_1191_MOESM12_ESM.pdf [file 41593_2022_1191_MOESM12_ESM.pdf]

f

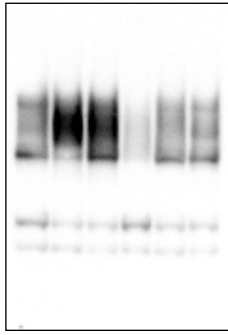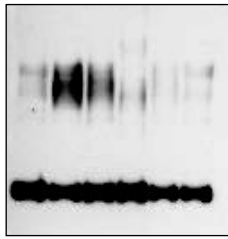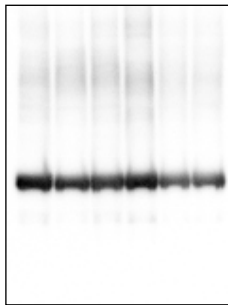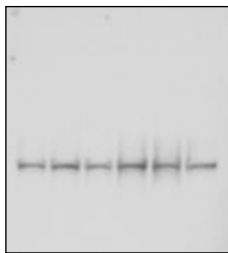

m

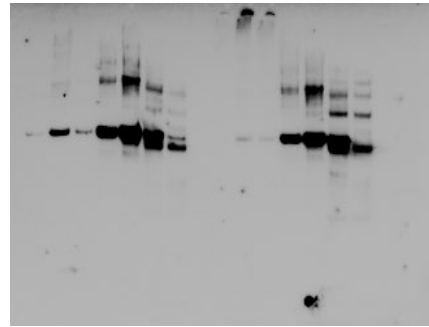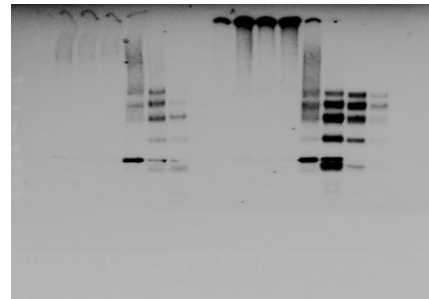

Uncropped and unprocessed western blot (WB) scans for Figure 5f and 5m. Figure (m) was cropped and reoriented for easier interpretation.
